# Supplementary material for: Magnesium Hydroxide as a Versatile Nanofiller for 3D-Printed PLA Bone Scaffolds
Source: MDPI journal article supplement (doi:10.3390/polym16020198), 2024-01-09
Supplement: s1 [file s1]

# Magnesium Hydroxide as a Versatile Nanofiller for 3D Printed PLA Bone Scaffolds

Wang Guo <sup>1,2,\*</sup>, Wenlang Bu <sup>1,2</sup>, Yufeng Mao <sup>1,2</sup>, Enyu Wang <sup>1,2</sup>, Yanjuan Yang <sup>1,2</sup>, Chao Liu <sup>1,2</sup>, Feng Guo <sup>3,4</sup>, Huaming Mai <sup>3,4</sup>, Hui You <sup>1,2,\*</sup> and Yu Long <sup>1,2,\*</sup>

<sup>1</sup> State Key Laboratory of Featured Metal Materials and Life-cycle Safety for Composite Structures, Guangxi University, Nanning 530004, China

<sup>2</sup> Guangxi Key Laboratory of Manufacturing System and Advanced Manufacturing Technology, School of Mechanical Engineering, Guangxi University, Nanning 530004, China

<sup>3</sup> Guangxi Key Laboratory of Oral and Maxillofacial Rehabilitation and Reconstruction, Guangxi Medical University, Nanning 530021, China

<sup>4</sup> Department of Oral and Maxillofacial Surgery, College of Stomatology, Guangxi Medical University, Nanning 530021, China

\* Correspondence: guowang@gxu.edu.cn or drwangguo@outlook.com (W.G.); hyou@gxu.edu.cn or usmlhy@iim.ac.cn (Y.H.); longyu@gxu.edu.cn (Y.L.)

## Supplementary Materials

**Table S1.** FDM 3D printing parameters.

|                           |             |
|---------------------------|-------------|
| Initial Layer Height      | 0.2mm       |
| Wall Thickness            | 0.8 mm      |
| Wall line count           | 2           |
| Top/Bottom Thickness      | 0.0 mm      |
| Top/Bottom Pattern        | Lines       |
| Top/Bottom Directions     | [90°, 180°] |
| Infill Line Distance      | 0.8 mm      |
| Infill Pattern            | Grid        |
| Build Plate Adhesion Type | Skirt       |
| Skirt Line Count          | 1           |
| Enable Retraction         | √           |
| Retraction Distance       | 6.5 mm      |
| Retraction Speed          | 25.0 mm/s   |
| Filling Density           | 100%        |

**Table S2.** Actual porosity data of the PLA/Mg(OH)<sub>2</sub> scaffolds (determined according to the liquid displacement method).

| Samples      | PLA         | 2.5Mg(OH) <sub>2</sub> | 5Mg(OH) <sub>2</sub> | 7.5Mg(OH) <sub>2</sub> | 10Mg(OH) <sub>2</sub> | 20Mg(OH) <sub>2</sub> |
|--------------|-------------|------------------------|----------------------|------------------------|-----------------------|-----------------------|
| Porosity (%) | 48.57± 3.40 | 45.77± 2.64            | 47.31± 2.85          | 46.70± 2.37            | 44.53± 1.95           | 43.63± 0.78           |

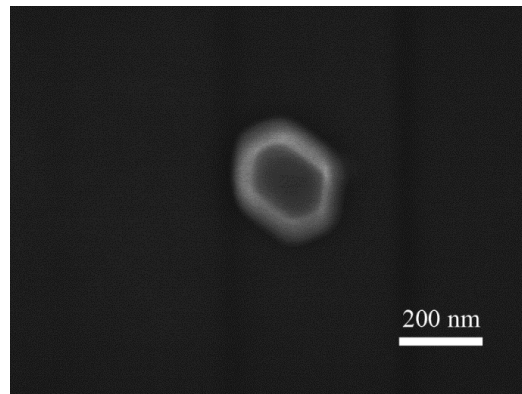

**Figure S1.** Representative SEM morphology of  $\text{Mg}(\text{OH})_2$ .

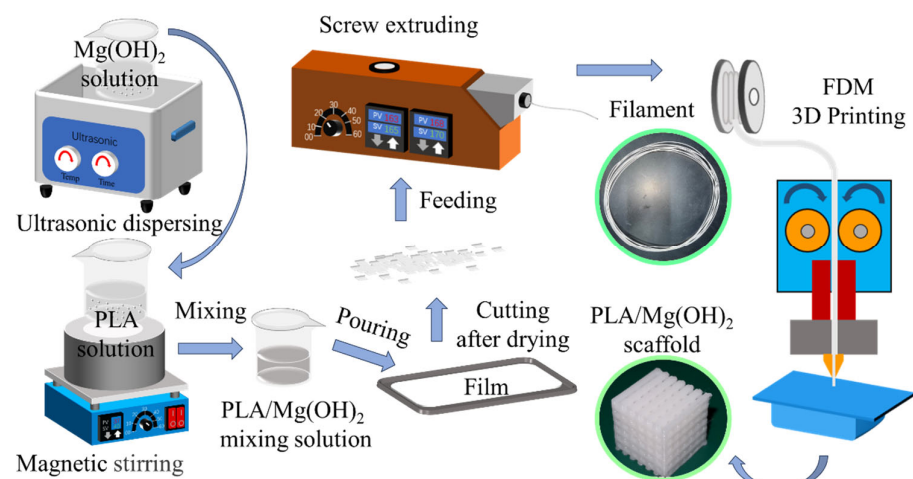

**Figure S2.** The schematic diagram of the preparation process for PLA/ $\text{Mg}(\text{OH})_2$  composite, filament and scaffold.

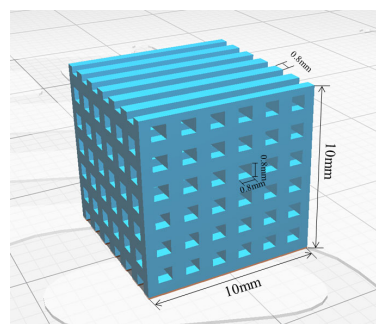

**Figure S3.** Schematic diagram of sample for the compression test.

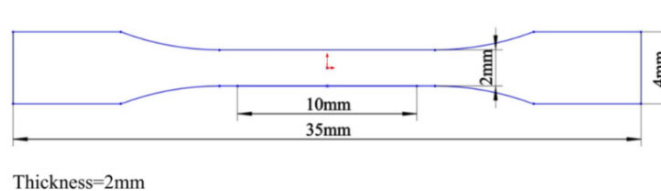

**Figure S4.** Schematic diagram of 1BB-type sample for the tensile test.
